# Supplementary material for: Comparative Performance Evaluation of Continuous Monitoring Blood Culture Systems Using Simulated Septic Specimen
Source: Preprints.org preprint supplement (doi:10.20944/preprints202411.0121.v1), 2024-11-04

Comparative Performance Evaluation of Continuous Monitoring Blood Culture Systems Using Simulated Septic Specimen

Kwangjin Ahn1, Taesic Lee2, Sangwon Hwang3, Dong Min Seo4, Young Uh1*

1 Department of Laboratory Medicine, Yonsei University Wonju College of Medicine, Wonju-si, Republic of Korea

2 Department of Family Medicine, Yonsei University Wonju College of Medicine, Wonju, Republic of Korea

3 Department of Precision Medicine, Yonsei University Wonju College of Medicine, Wonju, Republic of Korea

4 Department of Medical Information, Yonsei University Wonju College of Medicine, Wonju, Republic of Korea

*Corresponding author

Young Uh, M.D., Ph.D.

Department of Laboratory Medicine, Wonju Severance Christian Hospital, Yonsei University Wonju College of Medicine, 20 Ilsan-ro, Wonju 26426, Korea

E-mail: [u931018@yonsei.ac.kr](mailto:u931018@yonsei.ac.kr)

Supplementary Data

[**Tables** 3](#_Toc181354615)

[**Table S1. Test schedules** 3](#_Toc181354616)

[**Figures** 4](#_Toc181354617)

[**Figure S1. Verification of colony-forming units of *Candida albicans*.** 4](#_Toc181354618)

[**Figure S2. Verification of colony-forming units of *Staphylococcus aureus*.** 5](#_Toc181354619)

[**Figure S3. Verification of the colony-forming unit of *Streptococcus pneumoniae.*** 6](#_Toc181354620)

[**Figure S4. Verification of the colony-forming units of *Escherichia coli.*** 7](#_Toc181354621)

[**Figure S5. Colony-forming unit verification of *Pseudomonas aeruginosa.*** 8](#_Toc181354622)

[**Figure S6. Verification of colony-forming units of *Bacteroides fragilis*** 9](#_Toc181354624)

# **Tables**

| **Table S1. Test schedules** | | | |
| --- | --- | --- | --- |
| Microorganism | Number of tests (date of test, year-month-day) | | |
| BacT/Alert® 3D | BACTEC™ FX | HubCentra84 |
| *Candida albicans* | 10 (2024-07-16)  10 (2024-08-01)  3 (2024-08-28)  3 (2024-09-23)  4 (2024-09-25) | -  -  10 (2024-08-28)  10 (2024-09-23)  10 (2024-09-25) | 10 (2024-07-16)  10 (2024-08-01)  5 (2024-08-28)  3 (2024-09-23)  2 (2024-09-25) |
| *Staphylococcus aureus* | 10 (2024-07-25)  10 (2024-07-26)  5 (2024-09-03)  5 (2024-09-04) | -  -  15 (2024-09-03)  15 (2024-09-04) | 10 (2024-07-25)  10 (2024-07-26)  5 (2024-09-03)  5 (2024-09-04) |
| *Streptococcus pneumoniae* | 10 (2024-07-12)  10 (2024-08-02)  5 (2024-09-12)  5 (2024-09-13) | -  -  15 (2024-09-12)  15 (2024-09-13) | 10 (2024-07-12)  10 (2024-08-02)  5 (2024-09-12)  5 (2024-09-13) |
| *Escherichia coli* | 10 (2024-07-23)  10 (2024-07-24)  5 (2024-09-10)  5 (2024-09-11) | -  -  15 (2024-09-10)  15 (2024-09-11) | 10 (2024-07-23)  10 (2024-07-24)  5 (2024-09-10)  5 (2024-09-11) |
| *Pseudonomas aeruginosa* | 10 (2024-07-30)  10 (2024-07-31)  4 (2024-08-14)  3 (2024-08-20)  3 (2024-08-30) | -  -  10 (2024-08-14)  10 (2024-08-20)  10 (2024-08-30) | 10 (2024-07-30)  10 (2024-07-31)  -  -  10 (2024-08-30) |
| *Bacteroides fragilis* | 15 (2024-09-23)  15 (2024-09-24) | 15 (2024-09-23)  15 (2024-09-24) | 15 (2024-09-23)  15 (2024-09-24) |

# **Figures**

## **Figure S1. Verification of colony-forming units of *Candida albicans*.**


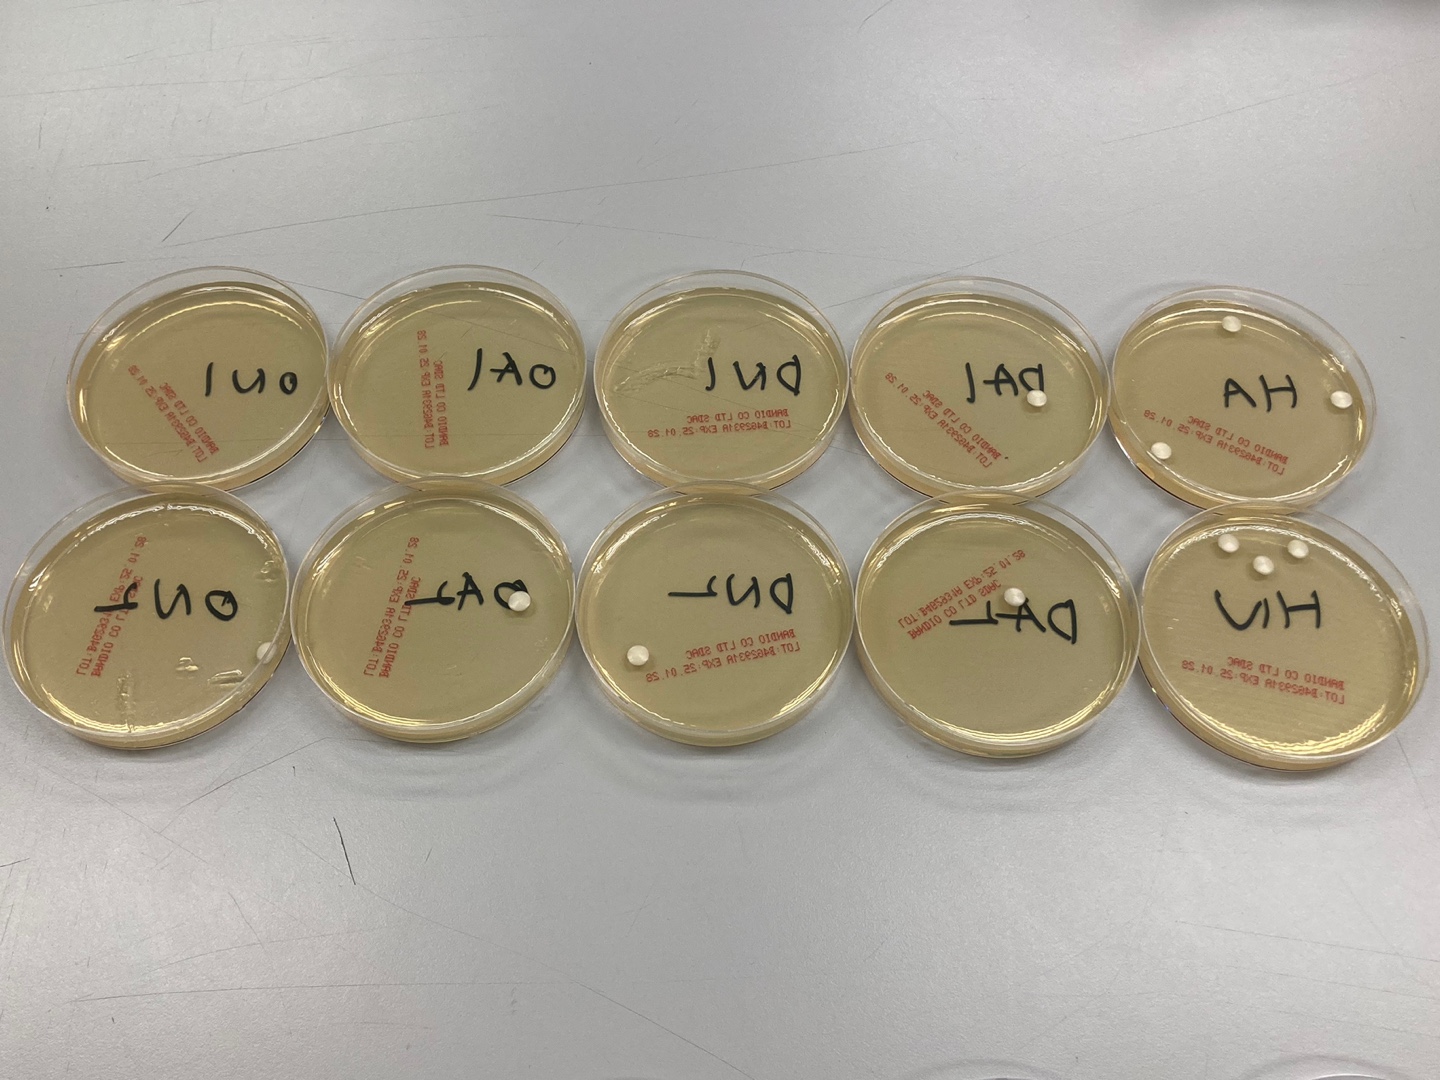


## **
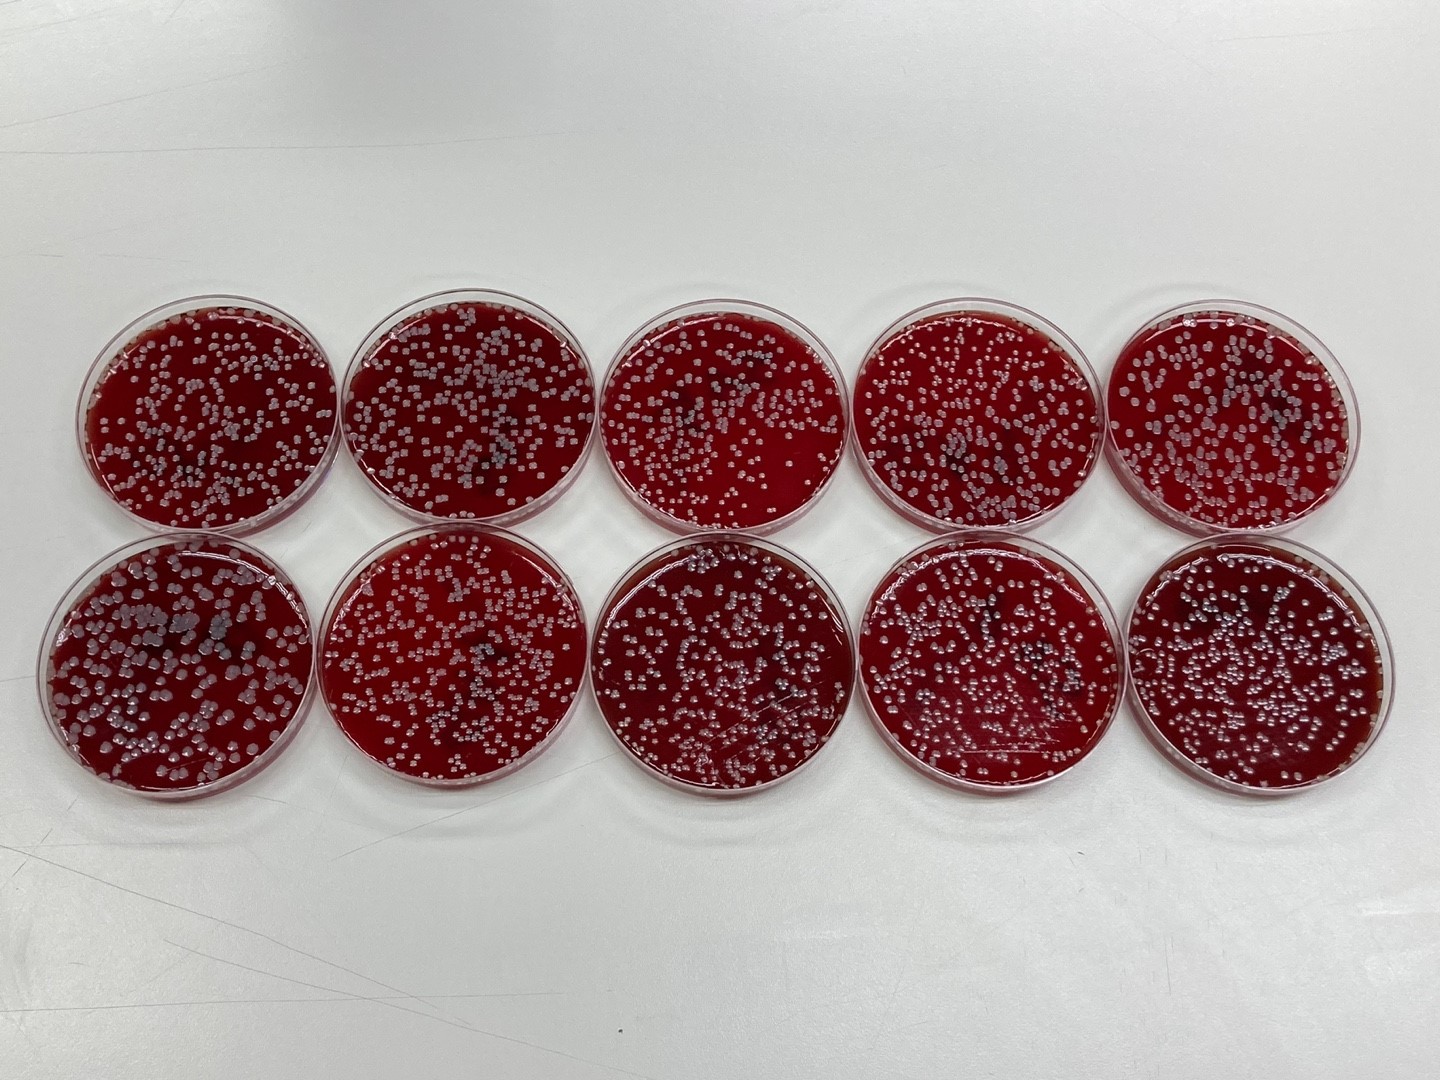
Figure S2. Verification of colony-forming units of *Staphylococcus aureus*.**

## **Figure S3. Verification of the colony-forming unit of *Streptococcus pneumoniae.***


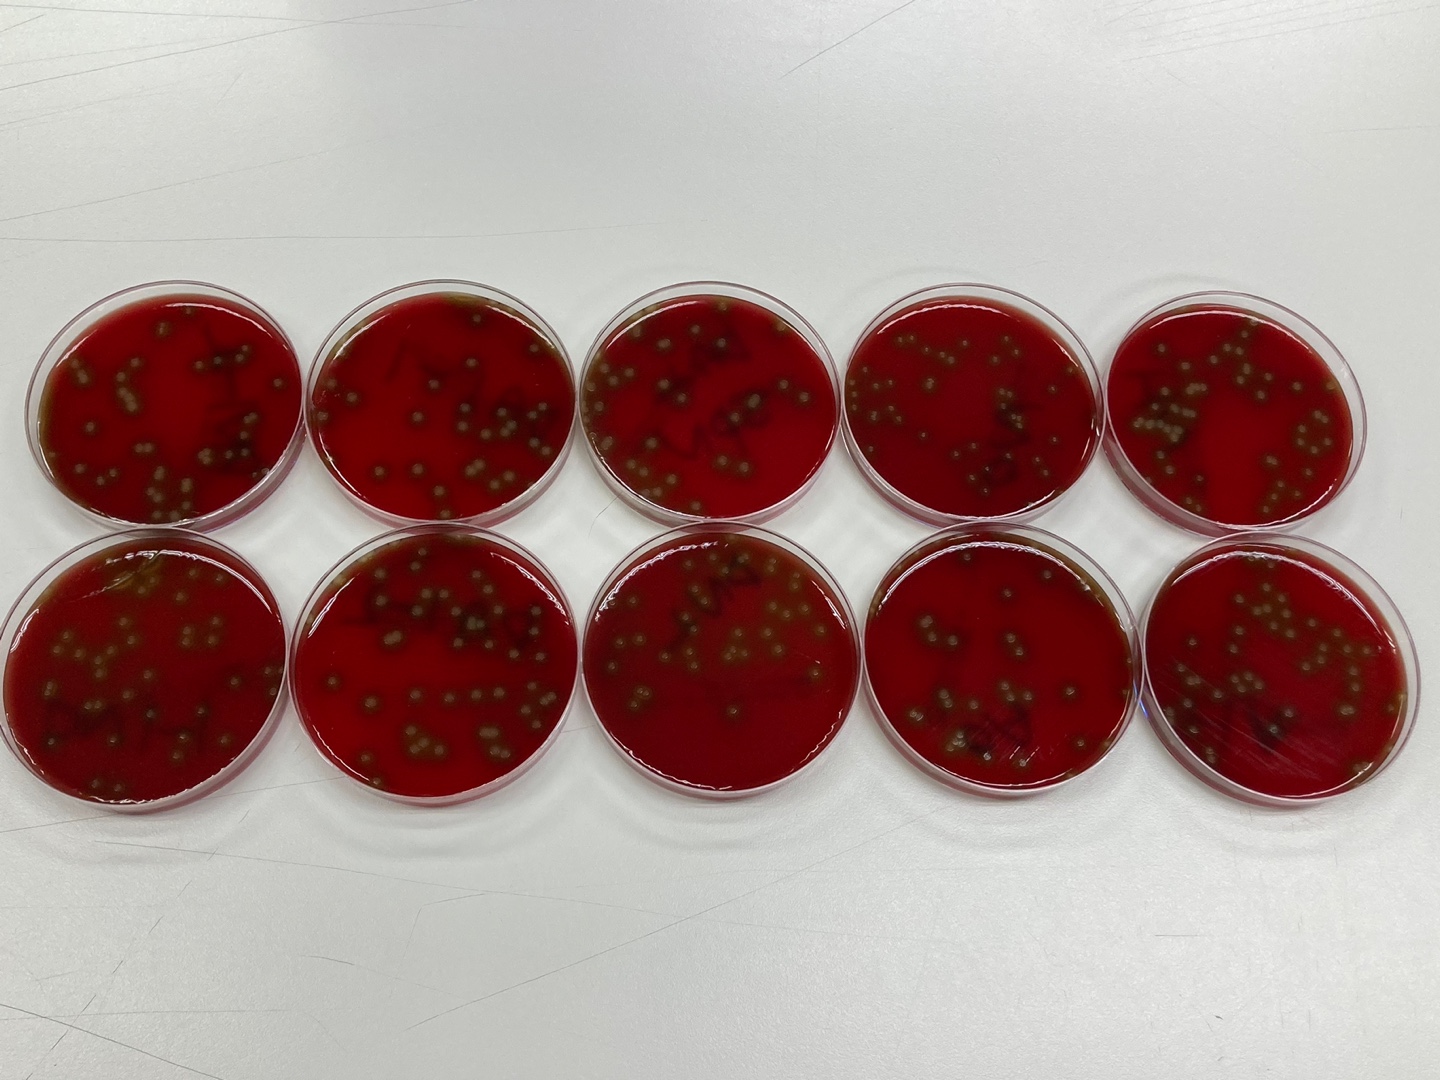


## **Figure S4. Verification of the colony-forming units of *Escherichia coli.***


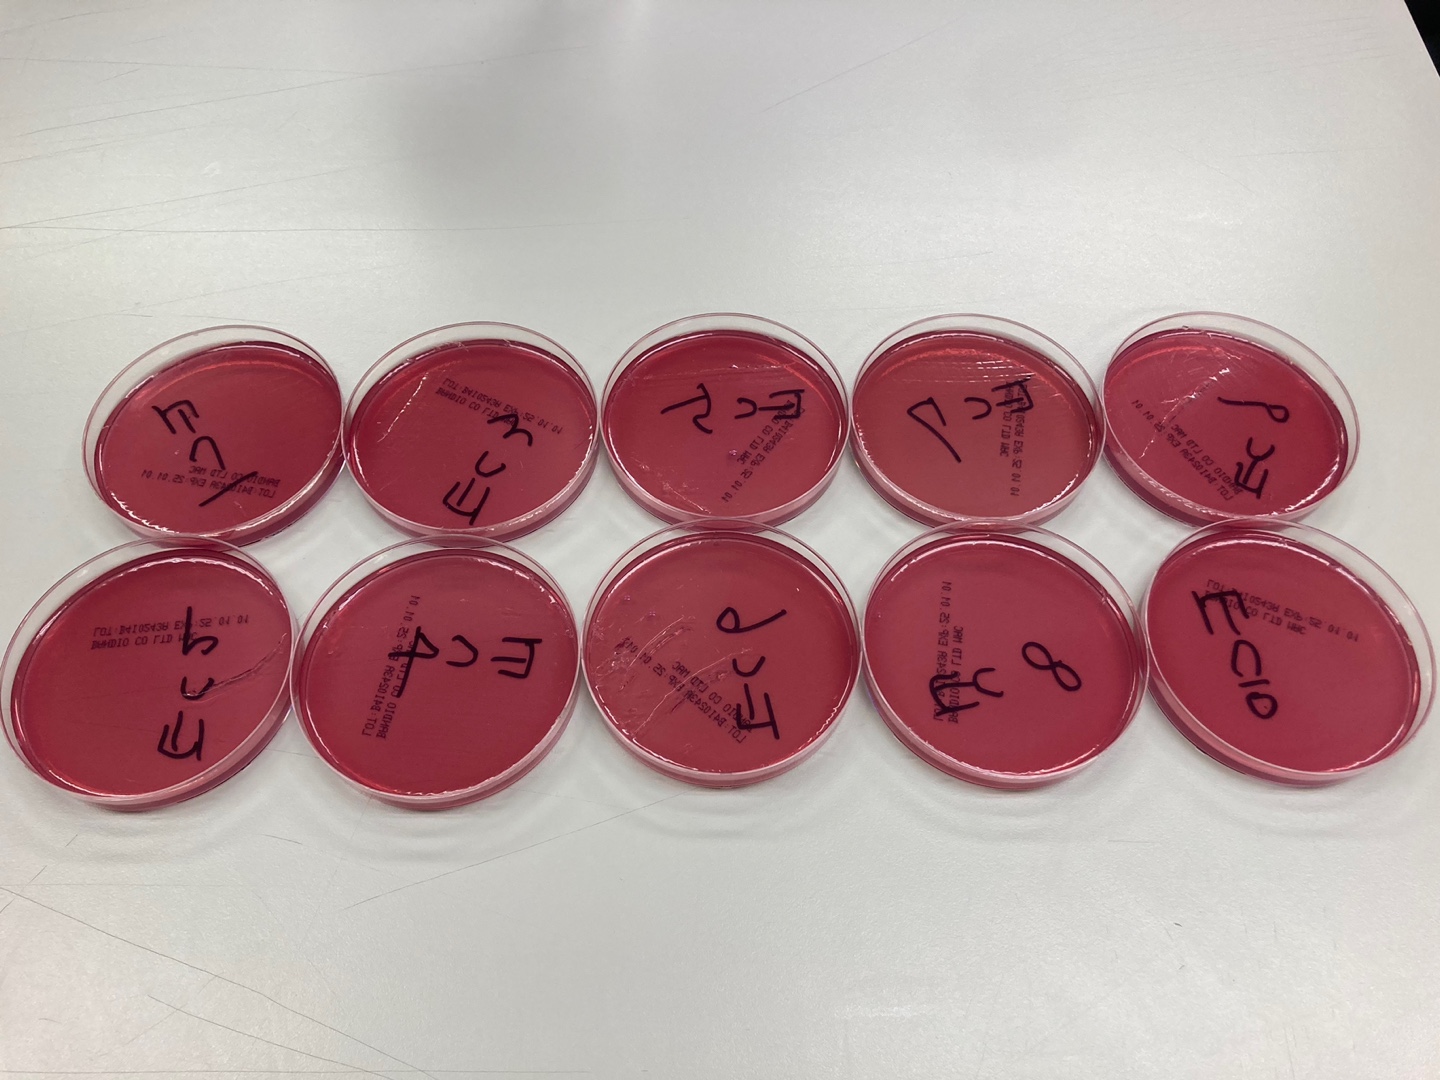


## **Figure S5. Colony-forming unit verification of *Pseudomonas aeruginosa.***


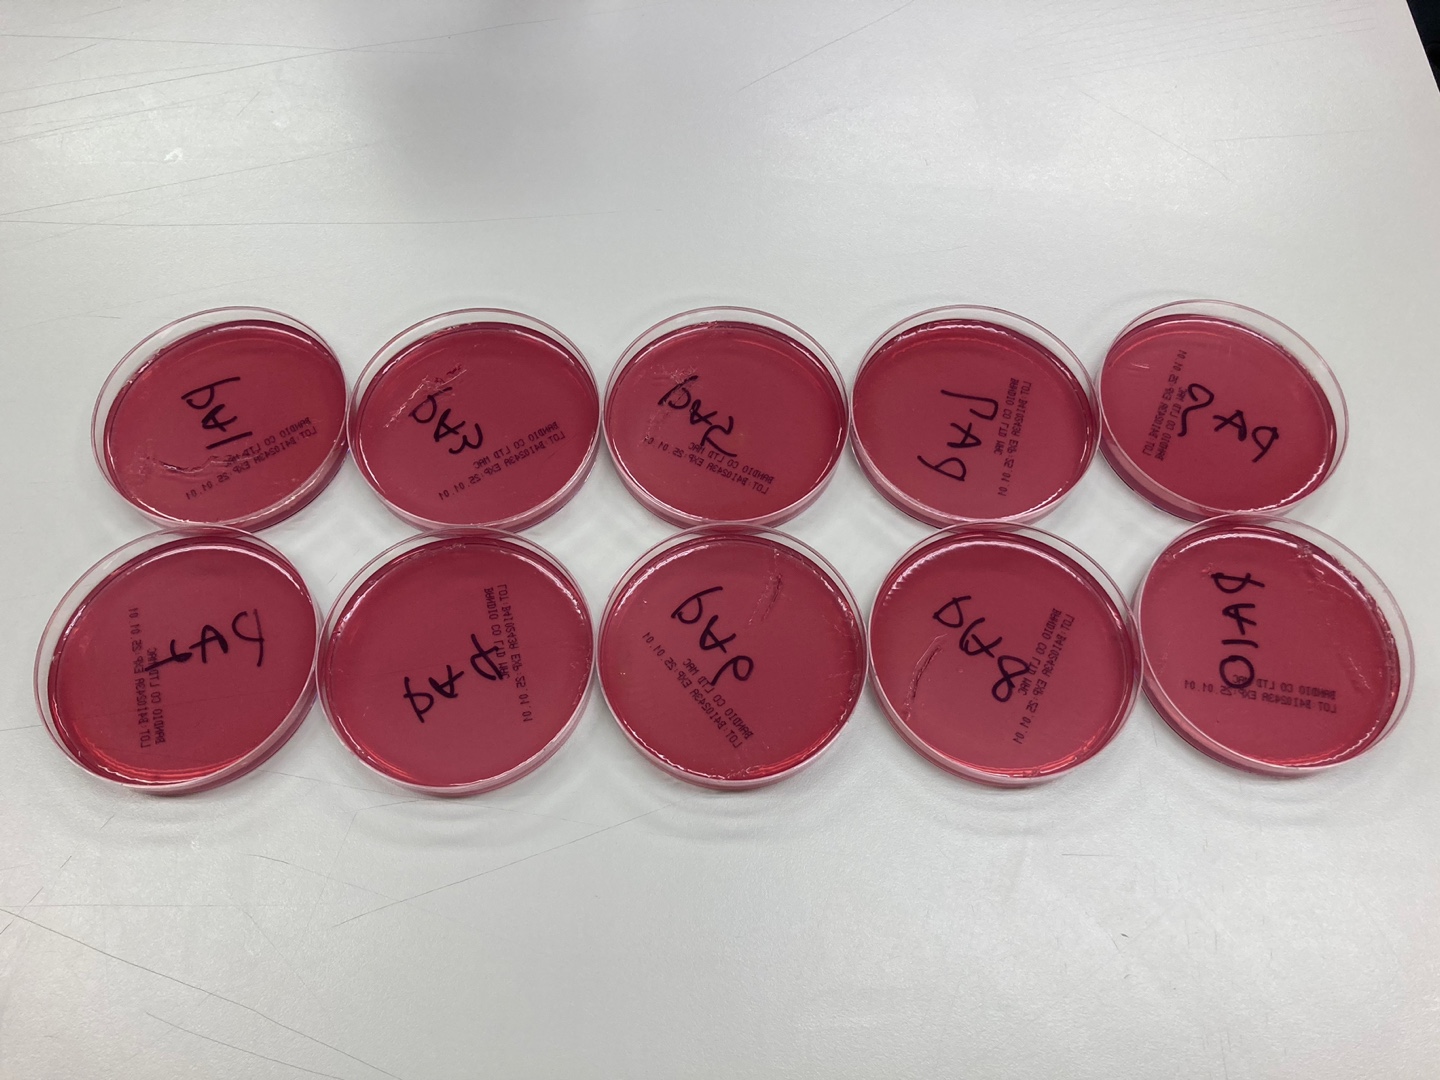


## **Figure S6. Verification of colony-forming units of *Bacteroides fragilis***


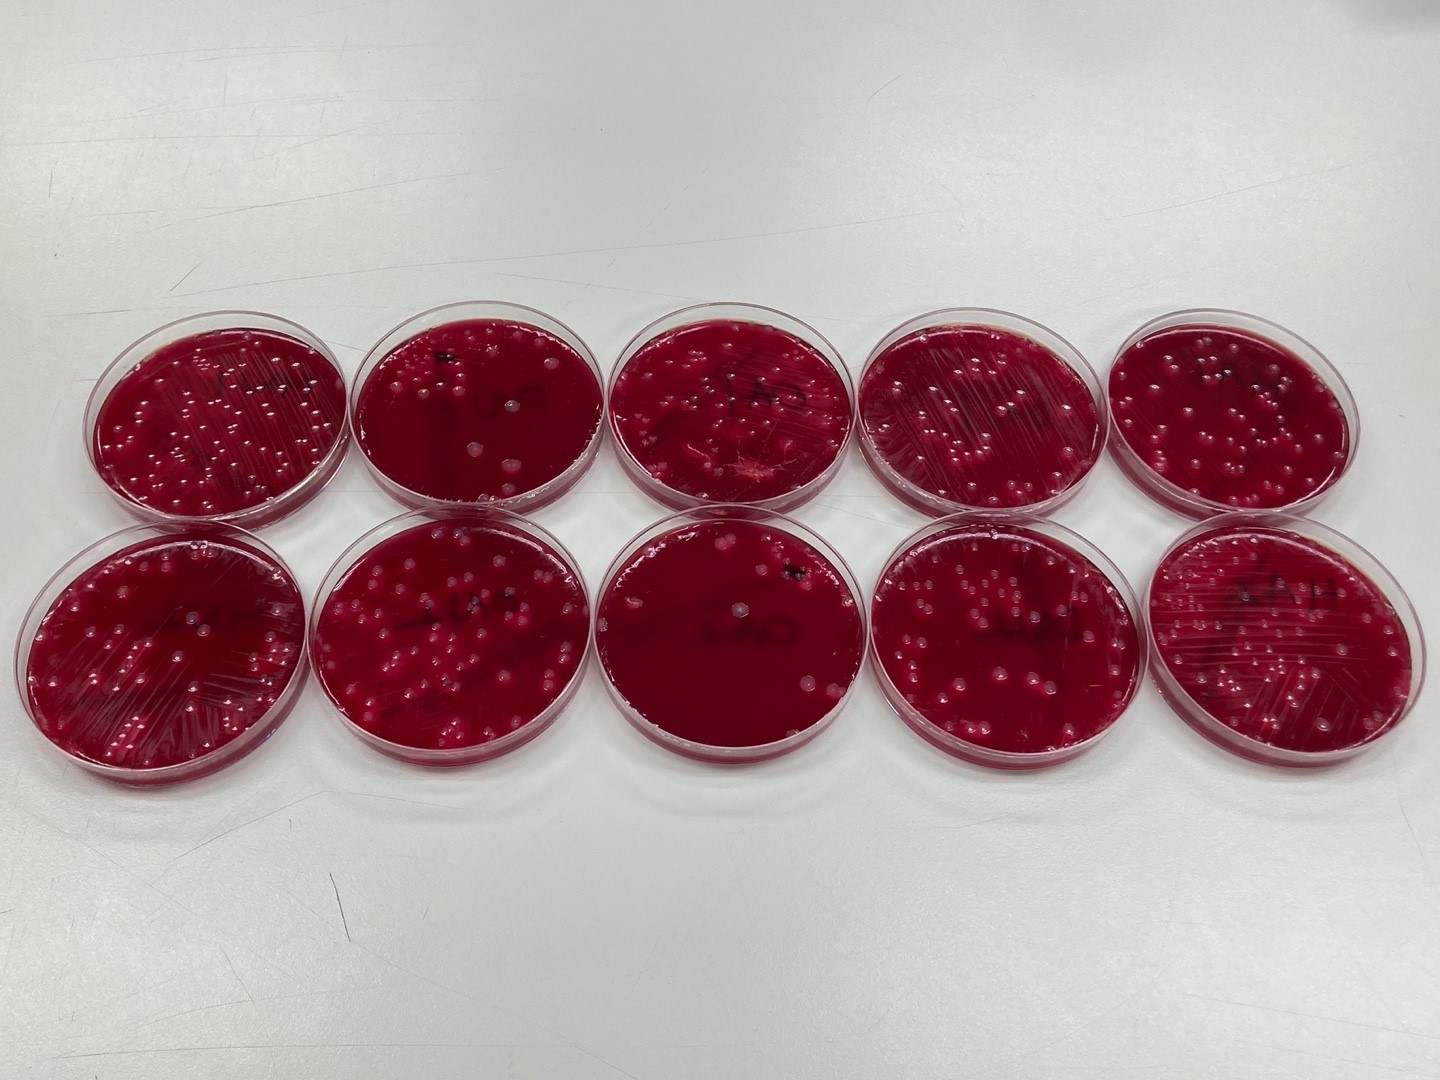

Supplement: Supplementary file 1 [file supplementary]
